# Supplementary material
Source: PubMed Central journal article supplement (PMC4429681)

**Supplemental Data**

**Drug Metabolism & Disposition**

**The Effects of Endoxifen and Other Major Metabolites of Tamoxifen on the Sulfation of Estradiol Catalyzed by Human Cytosolic Sulfotransferases hSULT1E1 and hSULT1A1\*1**

Edwin J. Squirewell and Michael W. Duffel\*

Division of Medicinal and Natural Products Chemistry, Department of Pharmaceutical Sciences and Experimental Therapeutics, College of Pharmacy, The University of Iowa, Iowa City, IA

**Supplemental Figure 1.** Initial velocities of hSULT1E1-catalyzed sulfation of estradiol (50  $\mu\text{M}$ ) with varied concentrations of PAPS. The  $K_m$  and  $V_{max}$  for PAPS was 1.5  $\mu\text{M}$  and 62 nmol/min/mg, respectively.

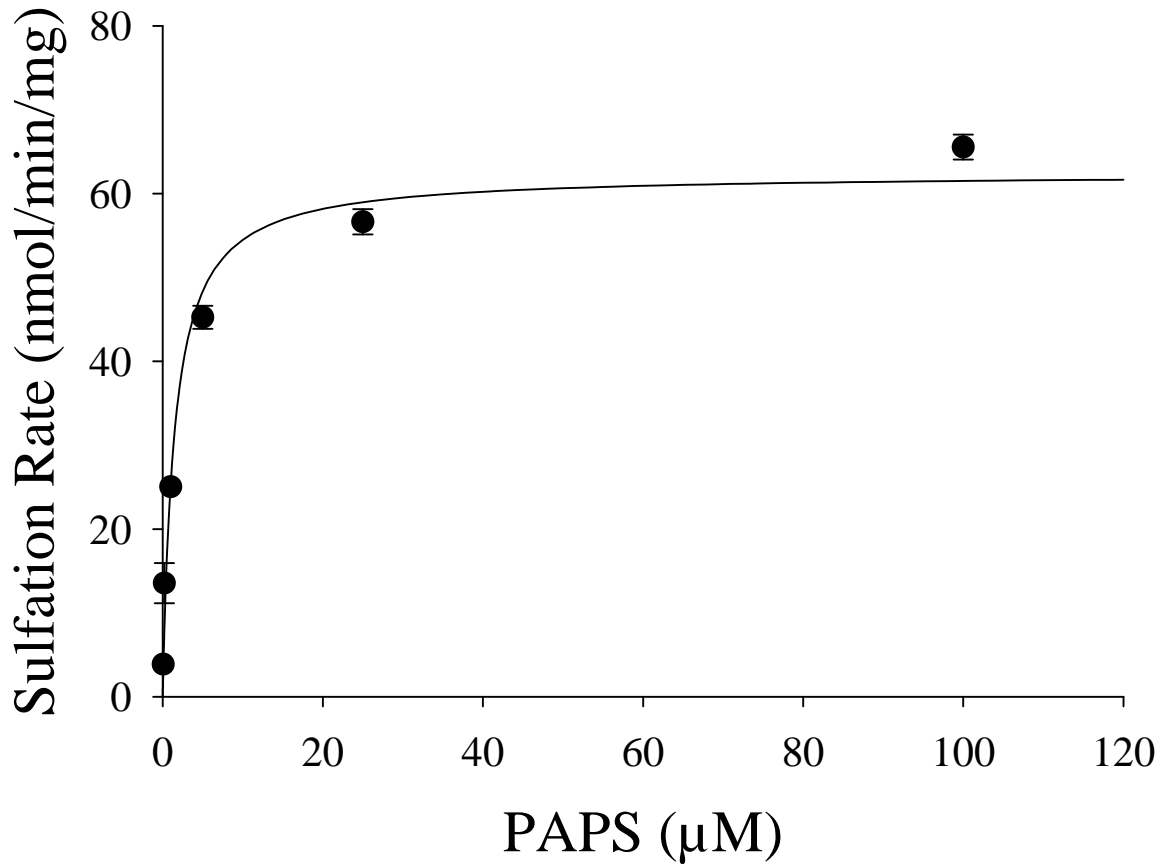

**Supplemental Figure 2.**  $K_i$  determinations for inhibitors of the hSULT1E1-catalyzed sulfation of estradiol. The inhibitors that were used in this study were (A) Endoxifen, (B) N-desTAM, (C) 4-OHTAM, and (D) TAM-NO. Each solid line represents a single concentration of inhibitor in the presence of various substrate concentrations, and data points are the means  $\pm$  standard error from triplicate determinations. For A-C, the inhibition model (either non-competitive or mixed) that provided the best fit to the data is shown. While an attempted fit of the data to a non-competitive inhibition equation is shown for D, neither this nor other simple inhibition models adequately described inhibition at the higher concentration of TAM-NO.

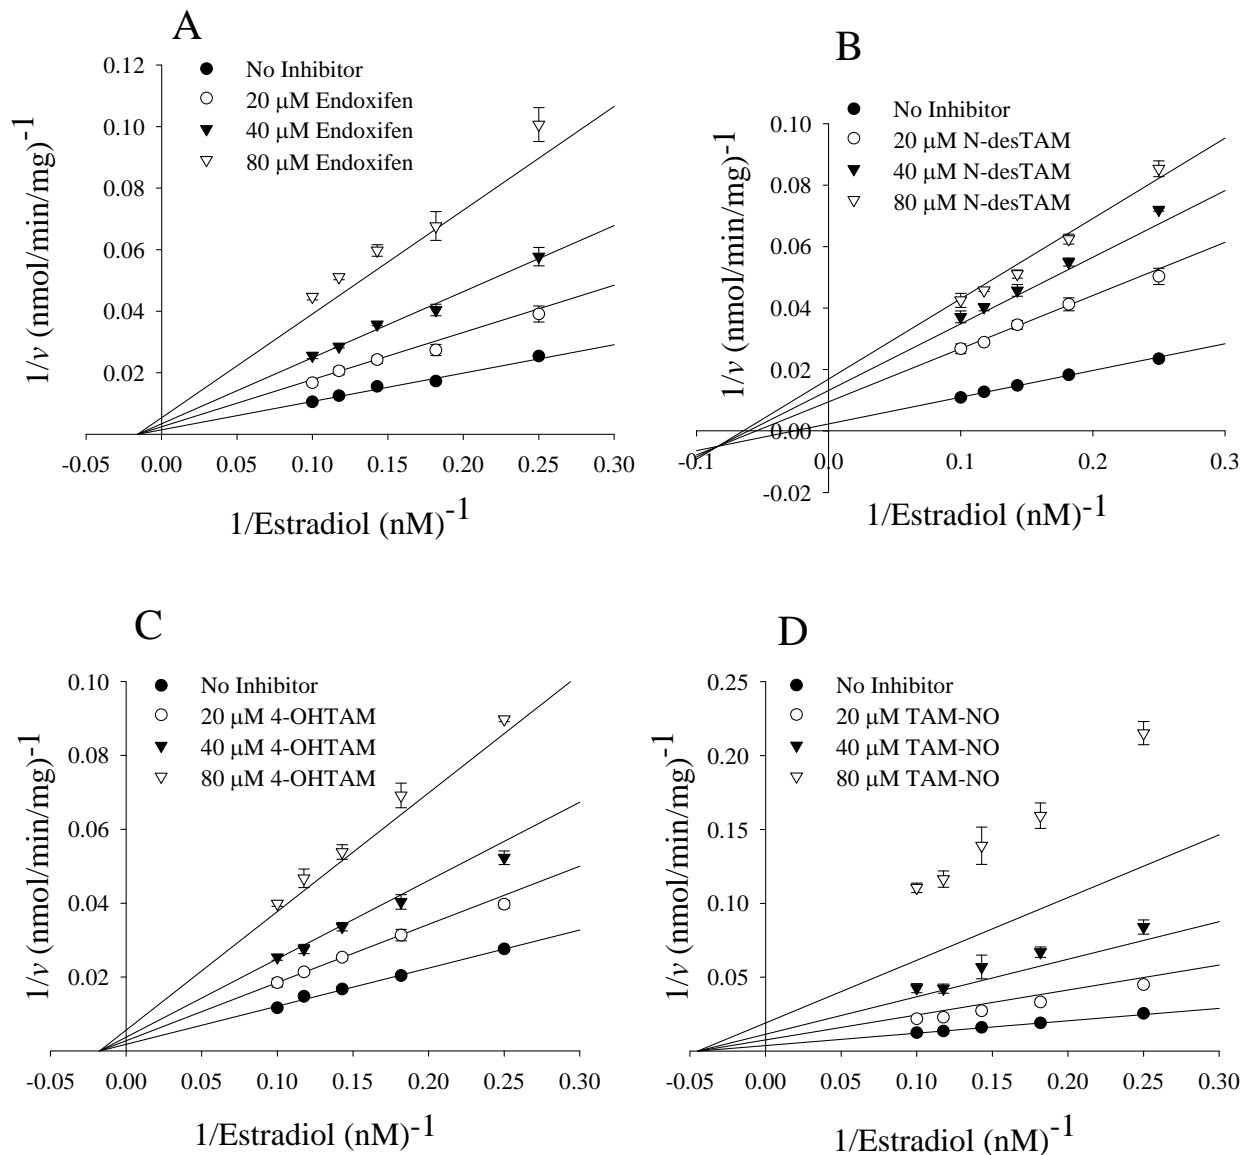

**Supplemental Figure 3.** Initial velocities of hSULT1A1\*1-catalyzed sulfation of estradiol (5  $\mu\text{M}$ ) with varied concentrations of PAPS. The  $K_m$  and  $V_{max}$  for PAPS was 1.1  $\mu\text{M}$  and 6.1 nmol/min/mg, respectively

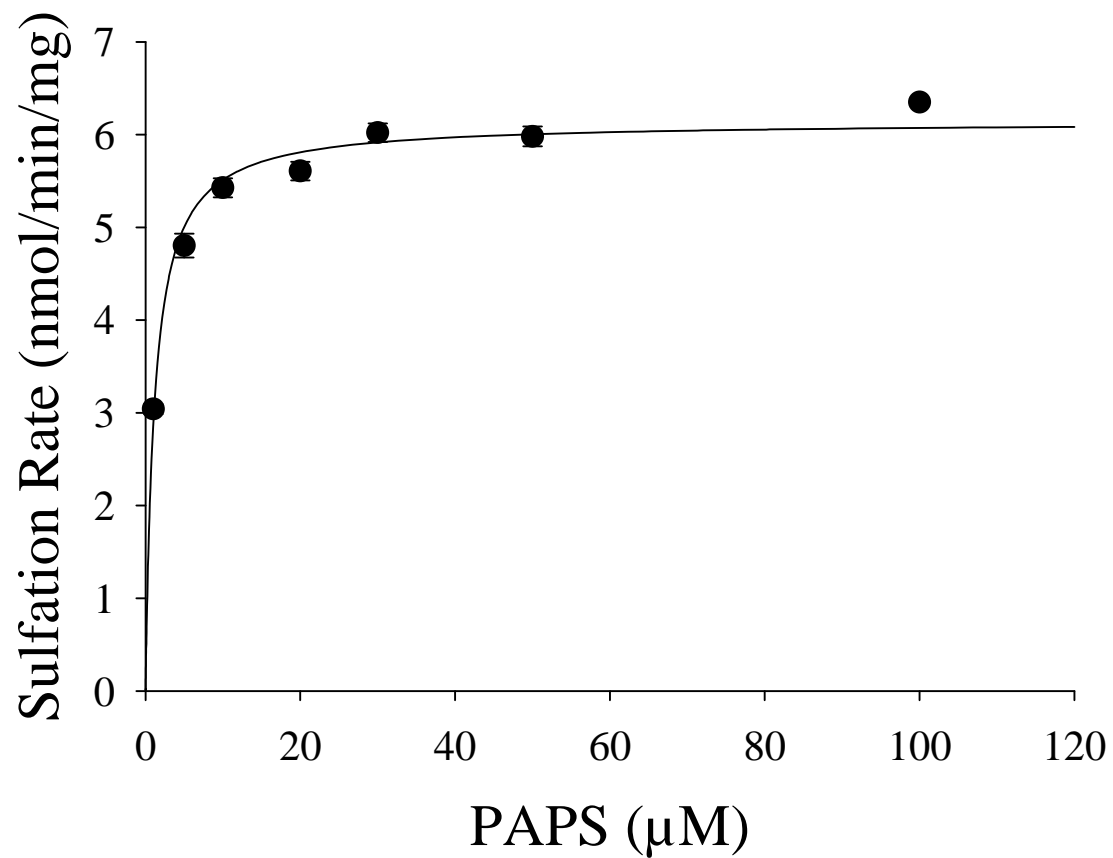

**Supplemental Figure 4.**  $K_i$  determinations for inhibitors of the hSULT1A1\*1-catalyzed sulfation of estradiol. The inhibitors that were used in this study were (A) endoxifen and (B) 4-OHTAM. Each solid line represents a single concentration of inhibitor in the presence of various substrate concentrations, and data points are the means  $\pm$  standard error from triplicate determinations. Data were fit using a competitive model for inhibition. As seen, the data for 4-OHTAM fit this model of inhibition well. However, the data for inhibition of the enzyme by endoxifen (A) did not fit a competitive inhibition model. Data for endoxifen as inhibitor also did not fit well to either non-competitive or mixed inhibition models under these assay conditions (not shown).

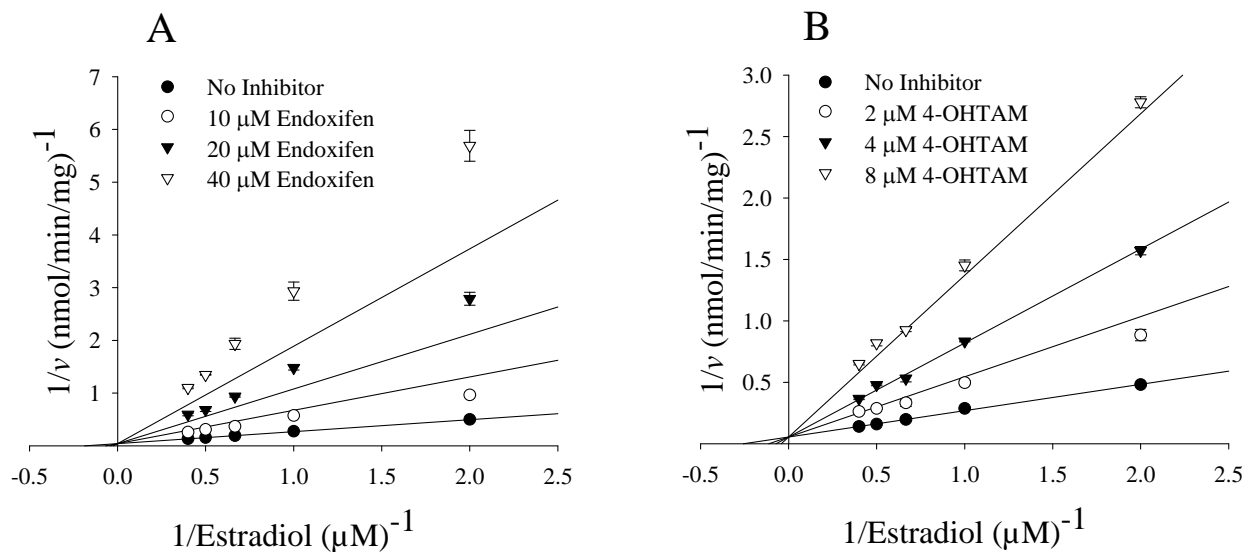

**Supplemental Figure 5.** LC-MS analysis of endoxifen sulfate formed in an enzymatic reaction catalyzed by hSULT1E1

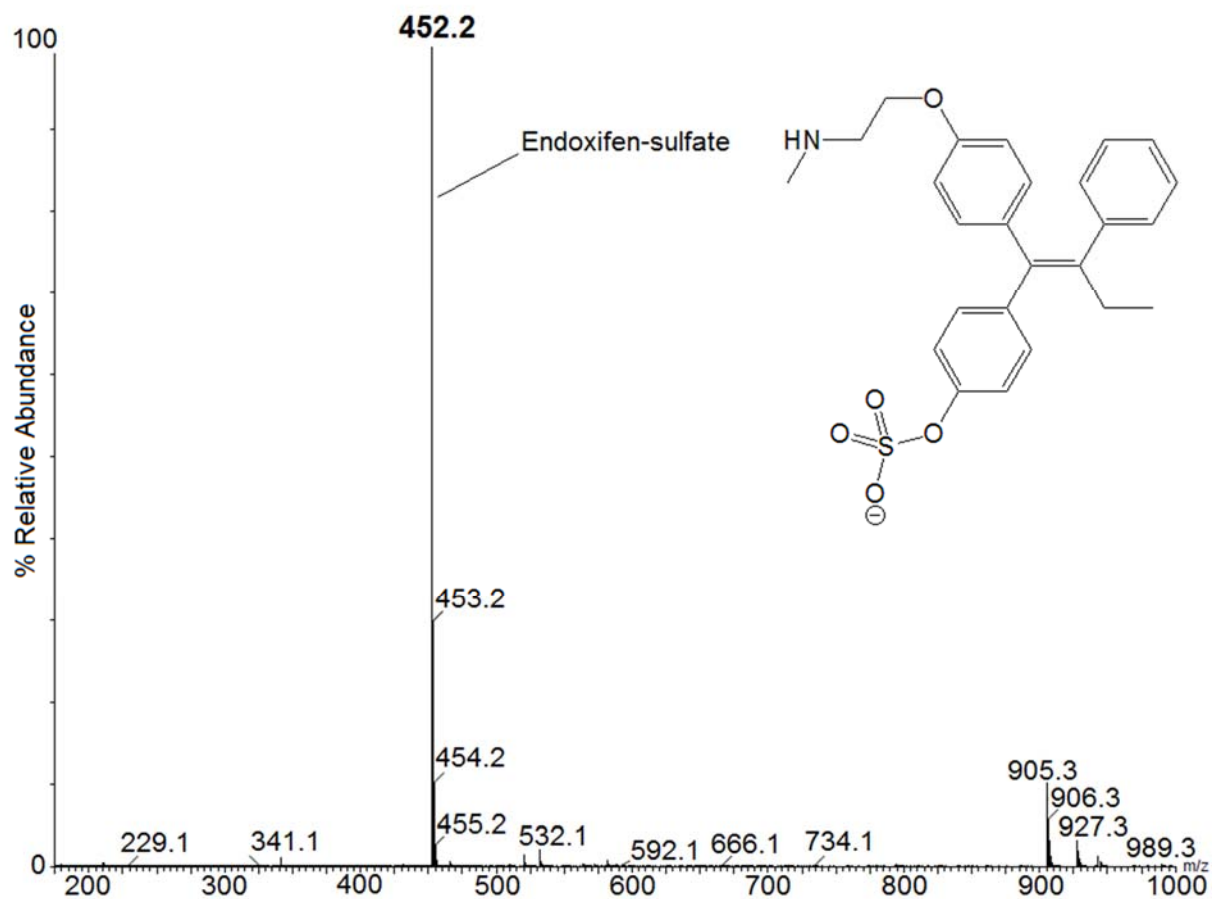

**Supplemental Figure 6.** LC-MS analysis of 4-TAM-SO<sub>4</sub> formed in an enzymatic reaction catalyzed by hSULT1E1

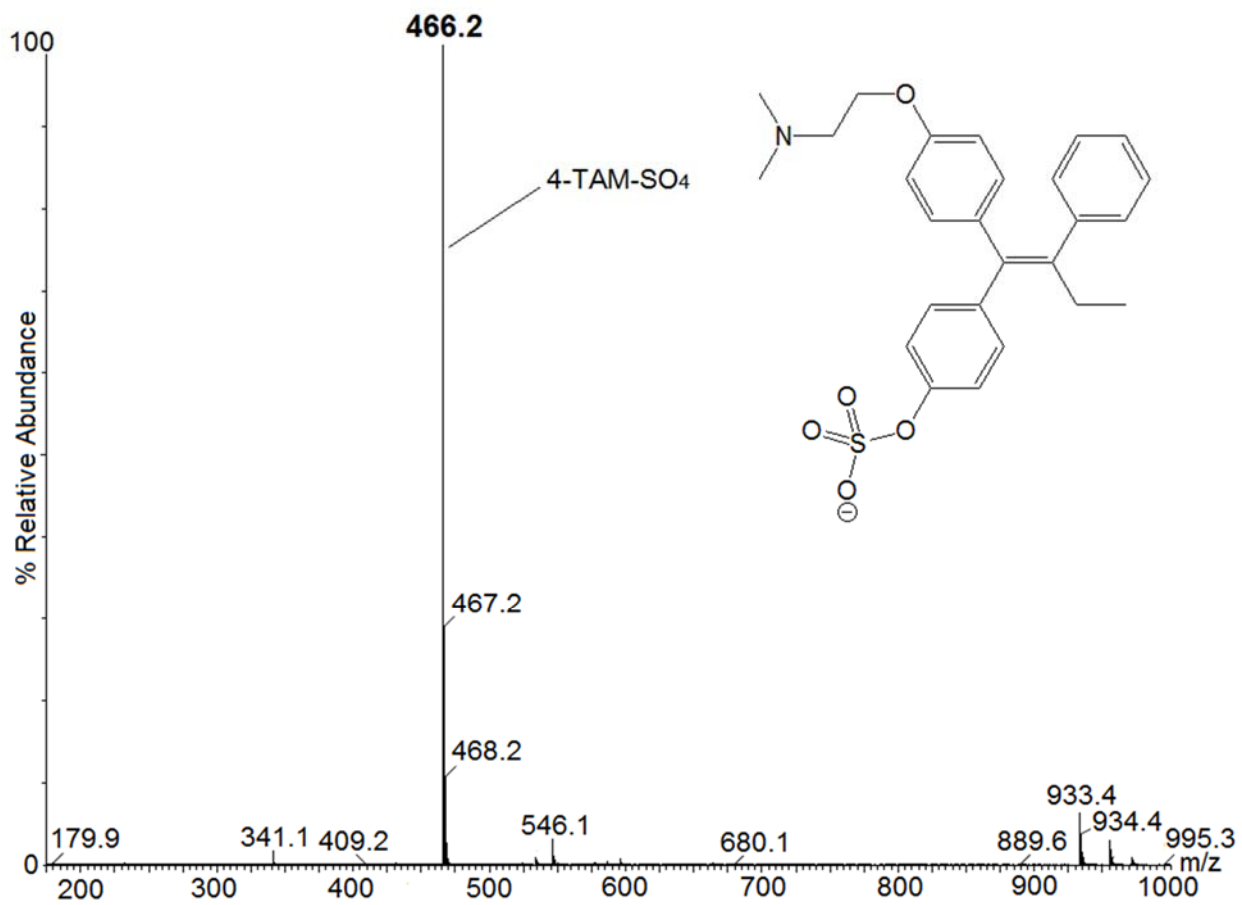

**Supplemental Figure 7.** LC-MS analysis of N-desTAM-S formed in an enzymatic reaction catalyzed by hSULT1E1.

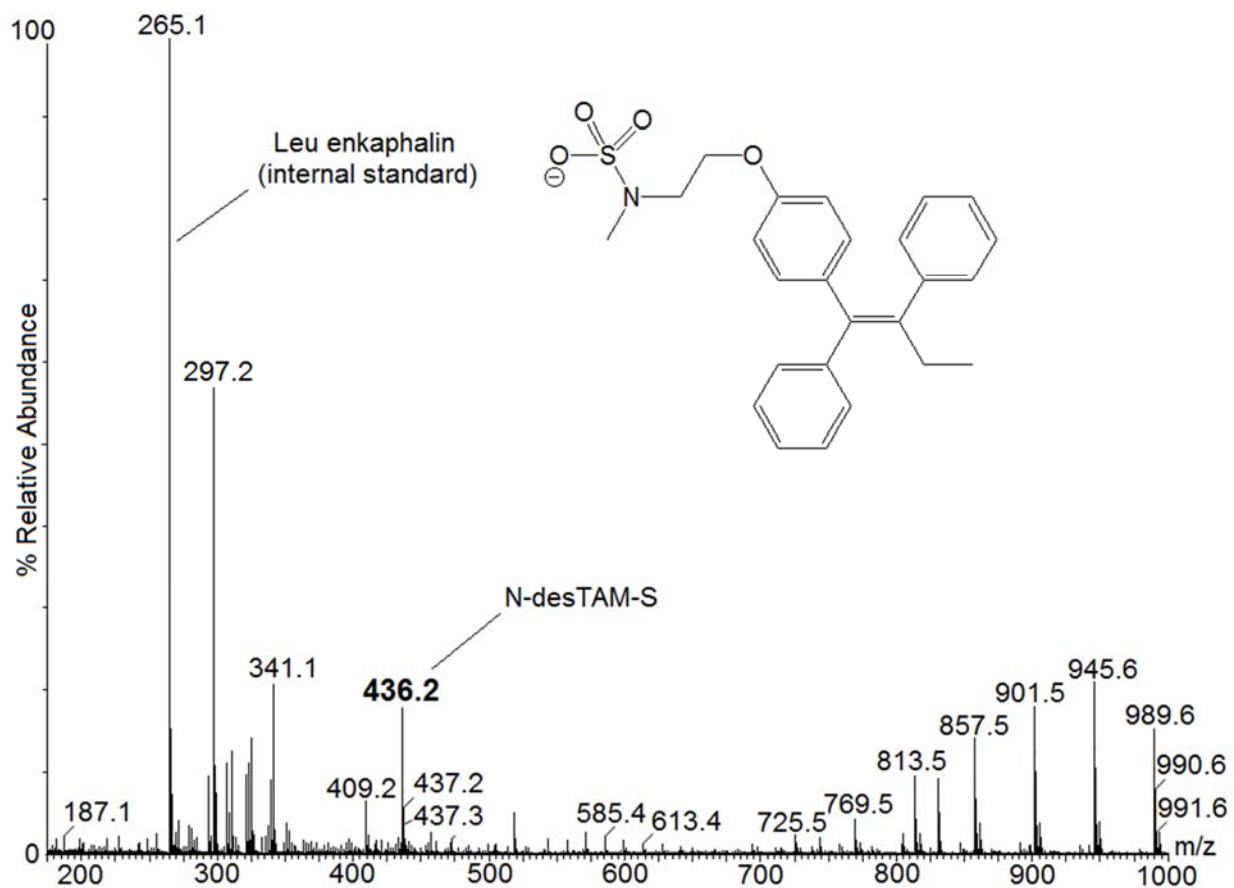



**Supplemental Figure 8.** LC-MS analysis of 4-TAM-SO<sub>4</sub> formed in an enzymatic reaction catalyzed by hSULT1A1\*1.

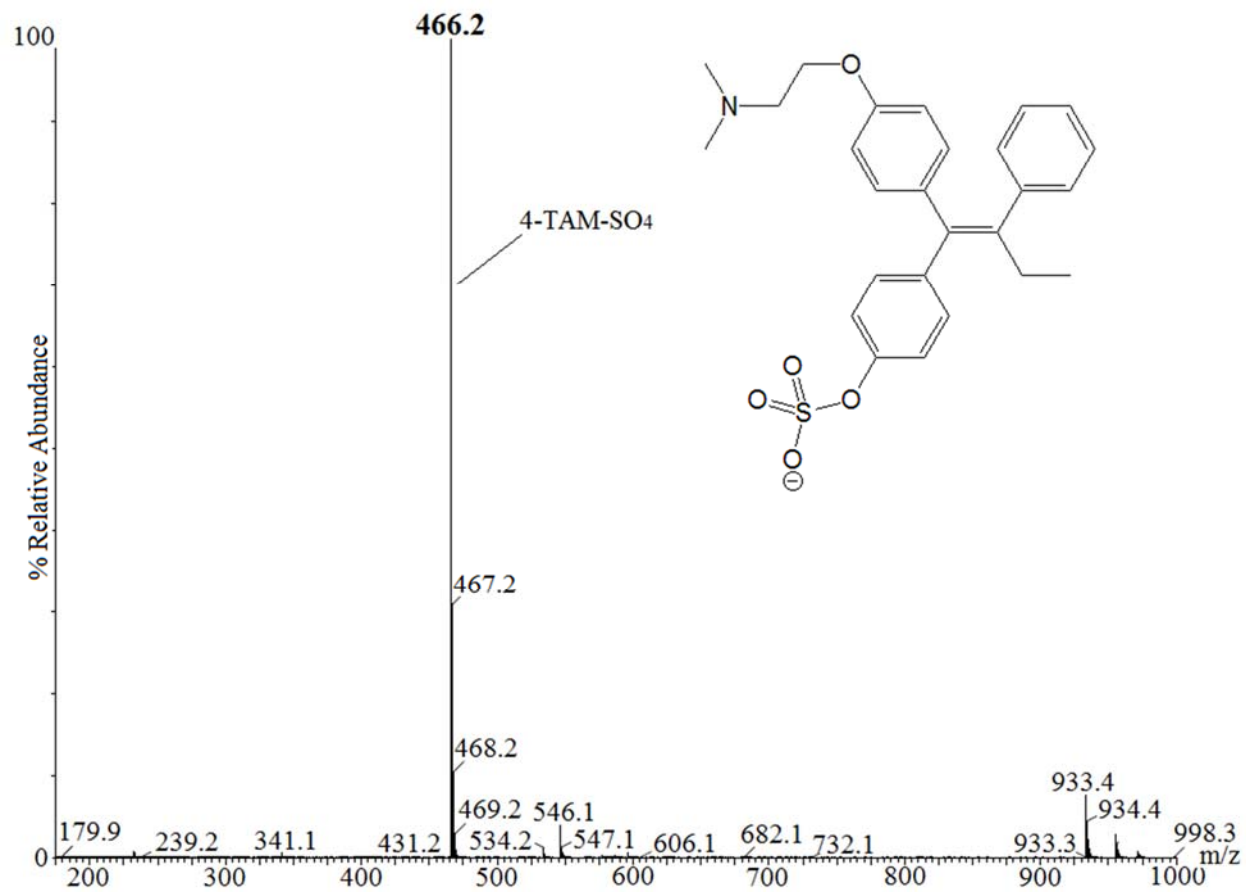

**Supplemental Figure 9.** LC-MS analysis of endoxifen-sulfate formed in an enzymatic reaction catalyzed by hSULT1A1\*1.

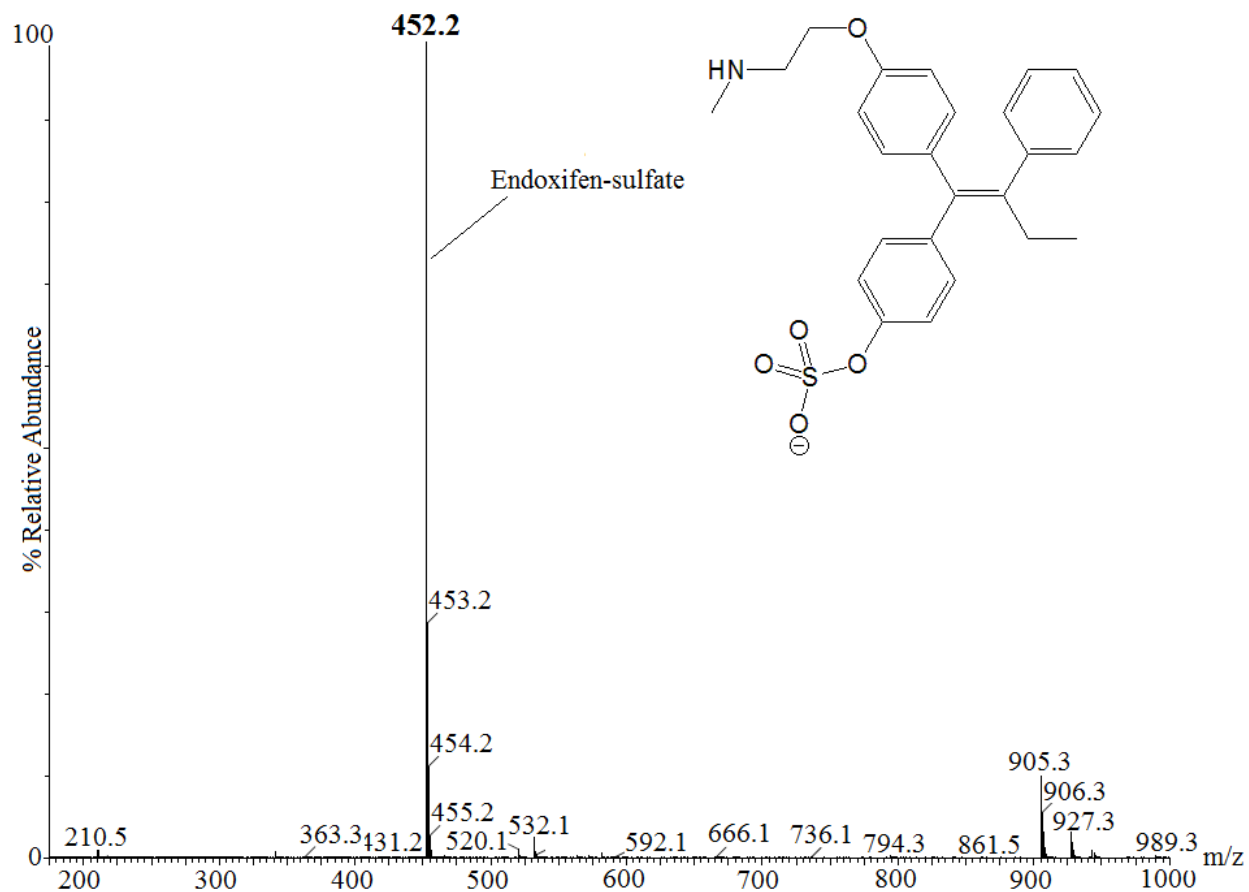

**Supplemental Figure 10.** LC-MS analysis of N-desTAM formed in an enzymatic reaction catalyzed by hSULT1A1\*1.

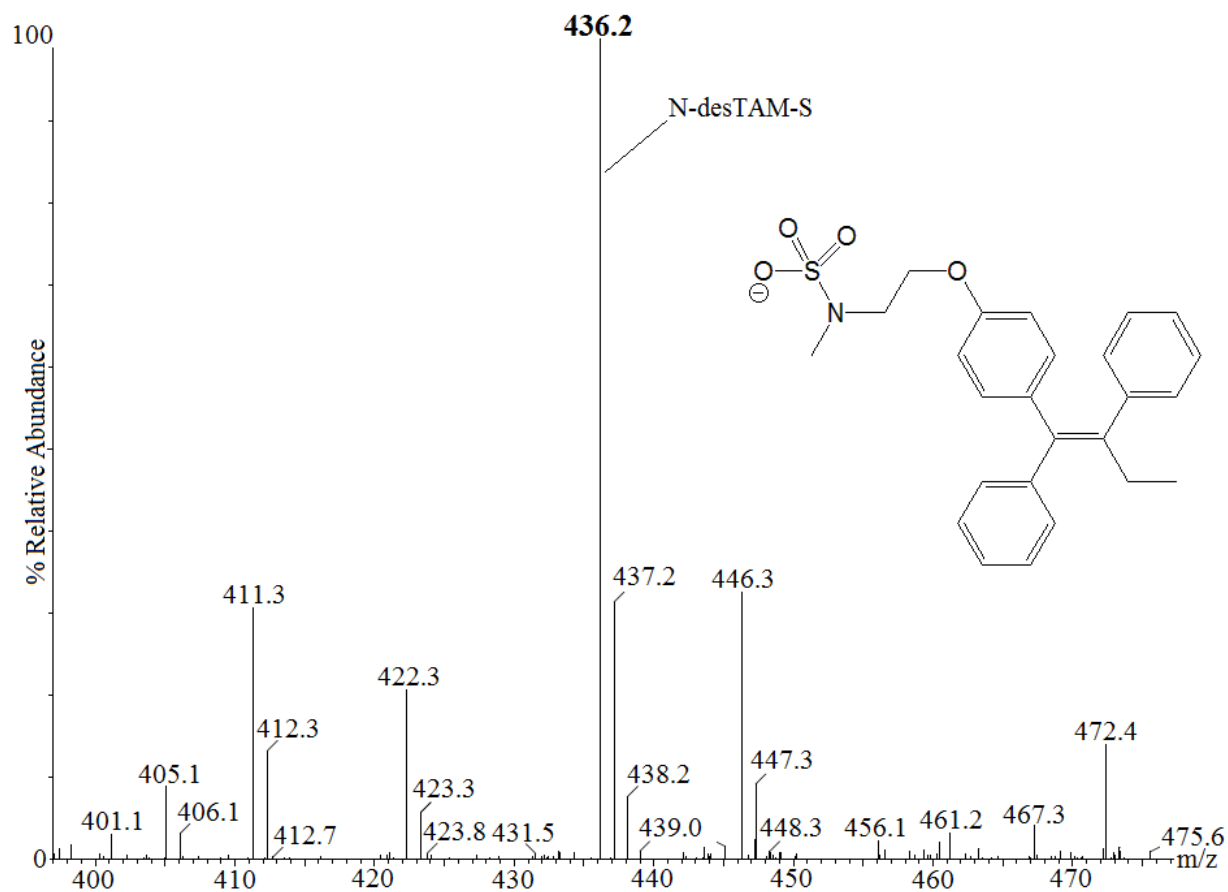

Supplement: supp_115.063206_Supplemental_63206.pdf [file supp_115.063206_Supplemental_63206.pdf]
